# Supplementary material for: Network Analysis of DSM Symptoms of Substance Use Disorders and Frequently Co-Occurring Mental Disorders in Patients with Substance Use Disorder Who Seek Treatment
Source: MDPI journal article supplement (doi:10.3390/jcm11102883), 2022-05-19
Supplement: s1 [file s1]

## **ICASA network group members**

Josep Antoni Ramos-Quiroga, MD, PhD

Department of Psychiatry, Hospital Universitari Vall d'Hebron, CIBERSAM

Group of Psychiatry, Mental Health and Addiction, Vall d'Hebron Research Institute

Department of Psychiatry and Forensic Medicine, Universitat Autònoma de Barcelona

Barcelona, Catalonia, Spain

Matthijs Blankers, PhD

Arkin Mental Health Care, Department of Research, Amsterdam, the Netherlands;

Trimbos institute, Netherlands Institute of Mental Health and Addiction, Utrecht, the Netherlands;

Amsterdam UMC, University of Amsterdam, Department of Psychiatry, Amsterdam, The Netherlands

Lara Grau, MD, PhD

Department of Psychiatry, Hospital Universitari Vall d'Hebron, CIBERSAM

Associated Professor of Psychiatry, Universitat Autònoma de Barcelona

Barcelona, Catalonia, Spain

Mathias Luderer, MD, PhD

Dpt. of Psychiatry, Psychosomatic Medicine and Psychotherapy, University Hospital, Goethe University Frankfurt, Germany

Frances R. Levin, MD

Columbia University Medical Center, New York State Psychiatric Institute, New York, NY  
United States of America

Sharlene Kaye, PhD

Research Unit, Justice Health and Forensic Mental Health Network

National Drug and Alcohol Research Centre, University of New South Wales

Sydney, Australia

Prof. Zsolt Demetrovics

Centre of Excellence in Responsible Gaming, University of Gibraltar, Gibraltar

Addiction Research Group, ELTE Eötvös Loránd University, Budapest, Hungary

Geurt van de Glind, PhD

Utrecht University of Applied Sciences, Utrecht, The Netherlands

Prof. Franz Moggi, PhD, EMBA

University Hospital of Psychiatry and Psychotherapy, University of Bern, Bern  
Switzerland

Maija Konstenius, PhD  
Section Head Outpatient Care, Stockholm Centre for Dependency Disorders  
Dept of Clinical Neuroscience, Karolinska Institutet  
Sweden

Geert Dom, MD PhD  
Antwerp University (UA, CAPRI), Belgium  
Psychiatric Center Multiversum, Boechout, Belgium

Frieda Matthys, MD PhD  
Department of Psychiatry, University Hospital Brussels, Vrije Universiteit Brussel (VUB)  
Belgium

Máté Kapitány-Fövény, PhD  
Semmelweis University Faculty of Health Sciences, Budapest, Hungary.  
Nyíró Gyula National Institute of Psychiatry and Addictions, Budapest,  
Hungary

Cleo L. Crunelle, PhD, PhD  
Department of Psychiatry, University Hospital Brussels (UZ Jette)  
Toxicological Center, University of Antwerp  
Belgium

Johan Franck, MD PhD  
Stockholm Centre for Dependency Disorders  
Dept of Clinical Neuroscience, Karolinska Institutet  
Sweden

Romain Icick, MD, PhD  
CSAPA Espace Murger  
Hôpital Fernand Widal  
France

Alex Begeman, MA  
De Hoop ggz, Department Education and Research, Clinic VZ ZW  
The Netherlands

Christoffer Brynte, MD  
Dept of Clinical Neuroscience, Karolinska Institutet  
Sweden

Sofie Verspreet, MA  
Multiversum, Mental Health care

Belgium

Michiel van Kernebeek, MD  
University Hospital Brussels (UZ Jette)  
Belgium

Constanza Daigre Blanco, PhD  
Department of Psychiatry, Hospital Universitari Vall d'Hebron  
Spain

Regina Sala, MD, PhD  
Centre for Psychiatry, Wolfson Institute  
Barts & The London School of Medicine & Dentistry  
Queen Mary University of London  
United Kingdom

Martin Holtmann, MD  
Chair of Child and Adolescent Psychiatry, Ruhr-University Bochum  
Medical Director, LWL-University Hospital for Child and Adolescent Psychiatry, Hamm  
Germany

Moritz Noack, MD  
LWL-University Hospital for Child and Adolescent Psychiatry, Hamm  
Germany

Csaba Barta, MD, PhD  
Institute of Medical Chemistry, Molecular Biology and Pathobiochemistry, Semmelweis  
University, Budapest, Hungary  
Pázmány Péter Catholic University, Faculty of Humanities and Social Sciences, Institute of  
Psychology, Budapest, Hungary

Natalie C. Sánchez-García, PhD  
PhD Program in Clinical Psychology, Universidad Carlos Albizu, San Juan, Puerto Rico  
School of Behavioral and Brain Sciences, Ponce Health Sciences University, Ponce, Puerto Rico

Steve Faraone, PhD  
Institute for Human Performance (IHP)  
Upstate Medical University, Syracuse, NY

Marta Ribasés  
VHIR Vall d'Hebron Research Institute  
Psychiatry, Mental Health and Addictions Research Group  
Barcelona, Catalonia, Spain

Renske Spijkerman  
Parnassia Addiction Research Center (PARC)  
Nijmegen, The Netherlands

Ilse Truter  
Distinguished Professor  
Leader of DURU  
Director, School of Clinical Care & Medicinal Sciences  
Drug Utilization Research Unit, Department of Pharmacy,  
Faculty of Health Sciences  
Nelson Mandela University  
Port Elizabeth, South Africa

Corné Coetzee  
Senior Lecturer Pharmacology  
Department of Pharmacy  
University of Limpopo  
Polokwane, South Africa

Izabela Przedzik  
Department of Cognitive Neuroscience,  
Radboud University Medical Centre,  
Nijmegen, The Netherlands

Amy Yule  
Boston Medical Center,  
Boston University School of Medicine, USA

Florence Vorspan  
Paris, France
