# Supplementary material for: Network Analysis of DSM Symptoms of Substance Use Disorders and Frequently Co-Occurring Mental Disorders in Patients with Substance Use Disorder Who Seek Treatment
Source: MDPI journal article supplement (doi:10.3390/jcm11102883), 2022-05-19
Supplement: s1 [file s1]

**Network analysis of DSM symptoms of substance use disorders and frequently co-occurring mental disorders in patients with substance use disorder who seek treatment**

**Table S1** Estimated thresholds for 41 DSM symptoms of SUD, ADHD, CD, MDD, and BPD for the entire sample ( $n = 772$ ) and the subsamples of males ( $n = 597$ ) and females ( $n = 175$ ). Symptoms with higher thresholds are more likely to occur in the population sampled

| Symptom | Thresholds                    |                        |                          |
|---------|-------------------------------|------------------------|--------------------------|
|         | Total sample<br>( $n = 772$ ) | Males<br>( $n = 597$ ) | Females<br>( $n = 175$ ) |
| I1      | -2.56                         | -2.08                  | -2.82                    |
| I2      | -2.95                         | -2.81                  | -1.49                    |
| I3      | -1.77                         | -2.16                  | -1.37                    |
| I4      | -1.96                         | -2.16                  | -1.76                    |
| I5      | -2.33                         | -2.13                  | -1.94                    |
| I6      | -1.75                         | -1.68                  | -1.70                    |
| I7      | -1.49                         | -1.45                  | -1.36                    |
| I8      | -1.98                         | -1.70                  | -1.28                    |
| I9      | -2.09                         | -1.86                  | -1.55                    |
| H1      | -1.82                         | -1.25                  | -1.77                    |
| H2      | -2.52                         | -2.66                  | -1.12                    |
| H3      | -2.24                         | -2.31                  | -0.84                    |
| H4      | -2.90                         | -2.68                  | -2.00                    |
| H5      | -1.69                         | -1.64                  | -1.21                    |
| H6      | -2.04                         | -2.34                  | -1.64                    |
| H7      | -1.75                         | -1.68                  | -1.21                    |
| H8      | -1.88                         | -1.51                  | -0.95                    |
| H9      | -3.15                         | -2.96                  | -2.43                    |
| B1      | -2.25                         | -2.28                  | -0.97                    |
| B2      | -2.15                         | -2.08                  | -1.45                    |
| B3      | -2.24                         | -2.06                  | -2.01                    |
| B4      | -0.52                         | -0.52                  | -0.20                    |
| B5      | -2.15                         | -2.06                  | -0.99                    |
| B6      | -2.83                         | -2.85                  | -0.95                    |
| B7      | -1.63                         | -1.60                  | -1.16                    |
| B8      | -2.40                         | -2.28                  | -1.58                    |
| B9      | -2.21                         | -2.29                  | -1.59                    |
| D1      | -1.96                         | -2.37                  | -0.86                    |
| D2      | -0.05                         | 0.03                   | 0.67                     |
| C1      | -1.45                         | -1.31                  | -0.91                    |
| C2      | -1.51                         | -1.25                  | -1.37                    |
| C3      | -1.93                         | -1.89                  | -1.31                    |
| C4      | -2.36                         | -2.54                  | -1.76                    |
| C5      | -3.37                         | -2.82                  | -2.96                    |
| S1      | -1.65                         | -1.49                  | -1.08                    |
| S2      | -1.36                         | -0.99                  | -2.03                    |
| S3      | -1.41                         | -0.93                  | -1.25                    |
| S4      | -2.67                         | -2.60                  | -1.44                    |
| S5      | -1.23                         | -1.26                  | -1.10                    |
| S6      | -2.11                         | -2.02                  | -1.73                    |
| S7      | -1.24                         | -1.11                  | -0.77                    |

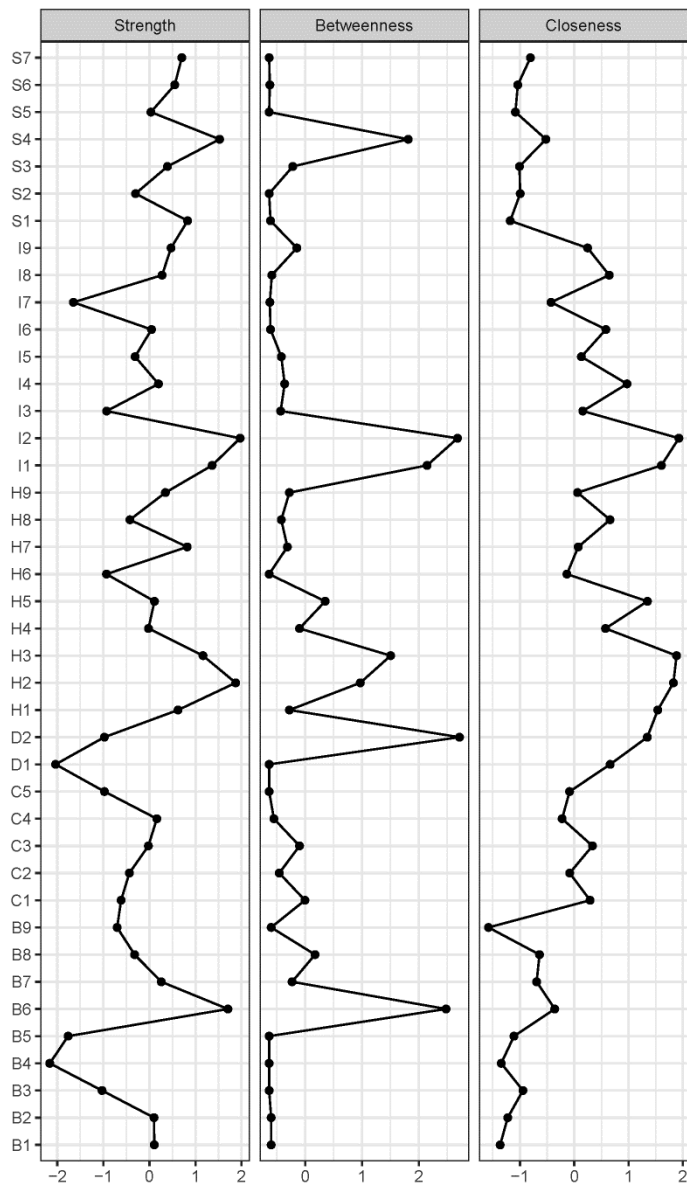

**Figure S1.** Three centrality measures of the nodes in the network of 41 DSM symptoms of SUD, ADHD, CD, MDD, and BPD for entire sample ( $n=772$ ). From left to right: node strength, betweenness, and closeness. Standardized z-scores are shown on the x-axis.

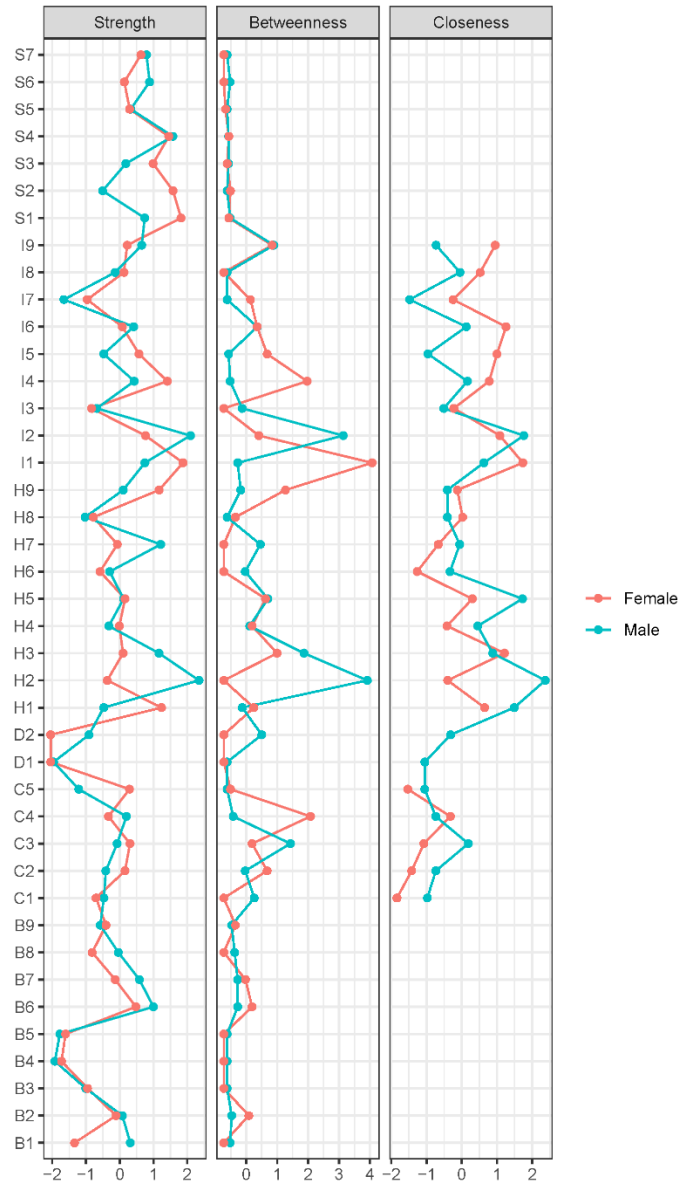

**Figure S2.** Three centrality measures of the nodes in the network of 41 DSM symptoms of SUD, ADHD, CD, MDD, and BPD, compared by gender. From left to right: node strength, betweenness, and closeness. Standardized z-scores are shown on the x-axis.
